# Supplementary material
Source: Research Square preprint supplement (doi:10.21203/rs.3.rs-8768923/v1)
Supplement: Supplementary file 1 [file ea103932997bc129fb3af750.pdf]

### TRANCEIVERS

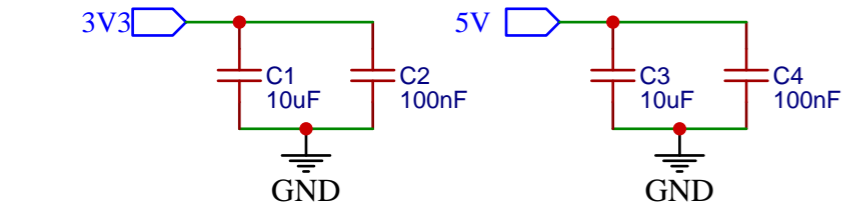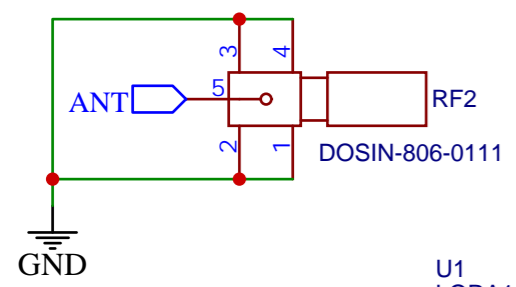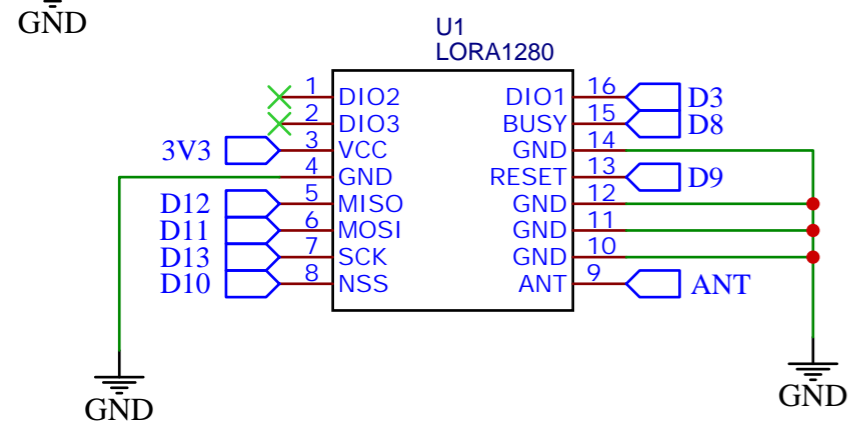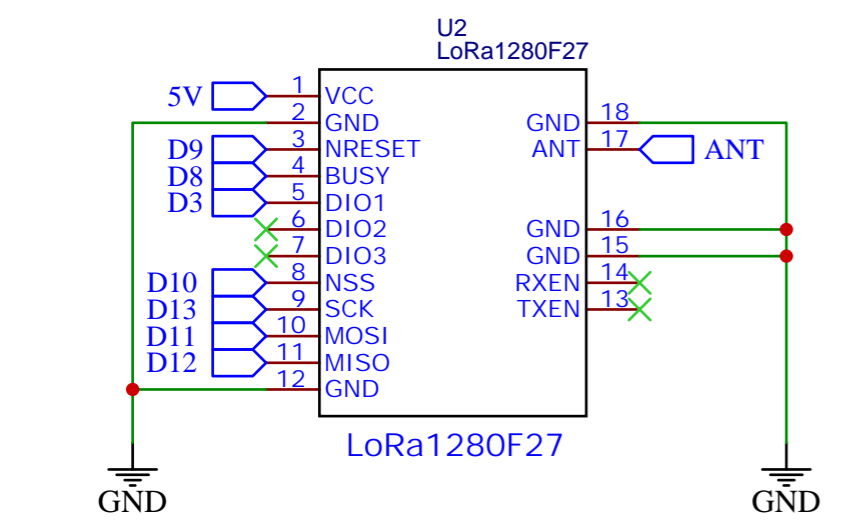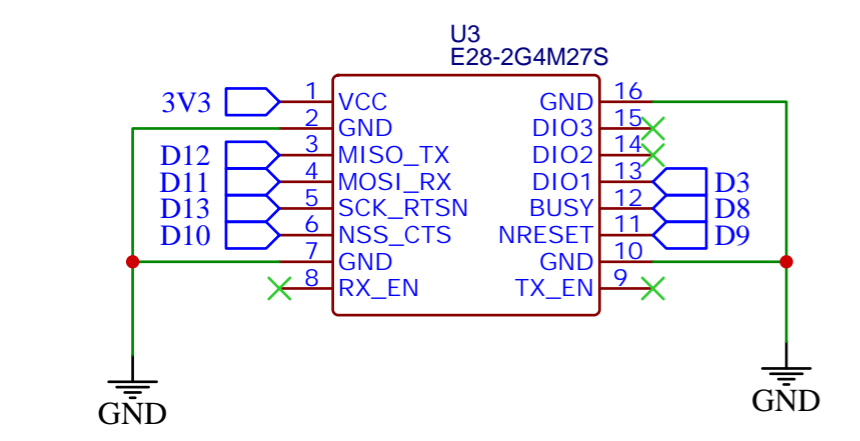

### ARDUINO NANO

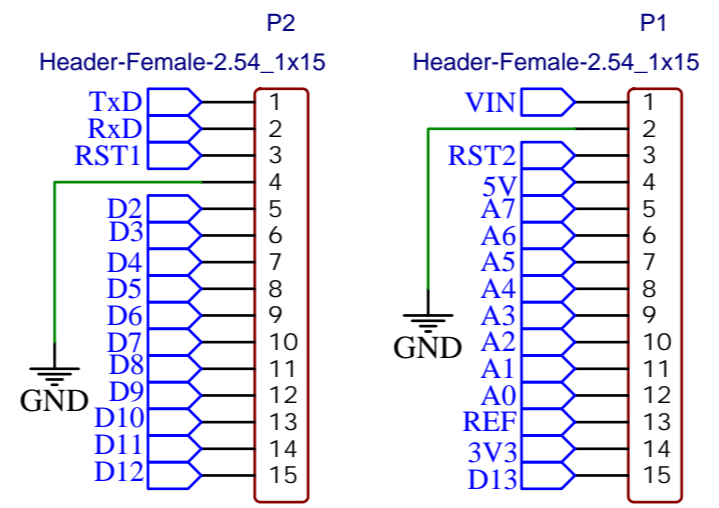

### SHIELD GPS ON/OFF

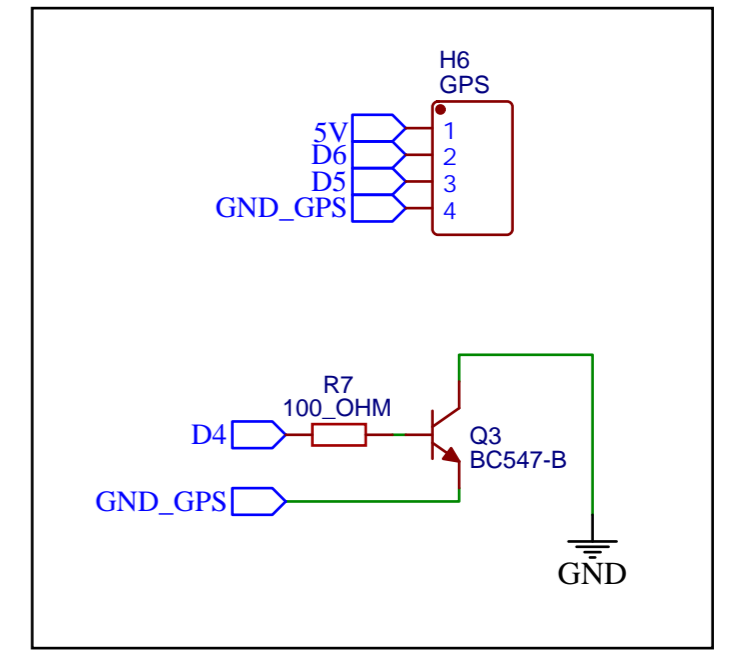

### BRIDGES

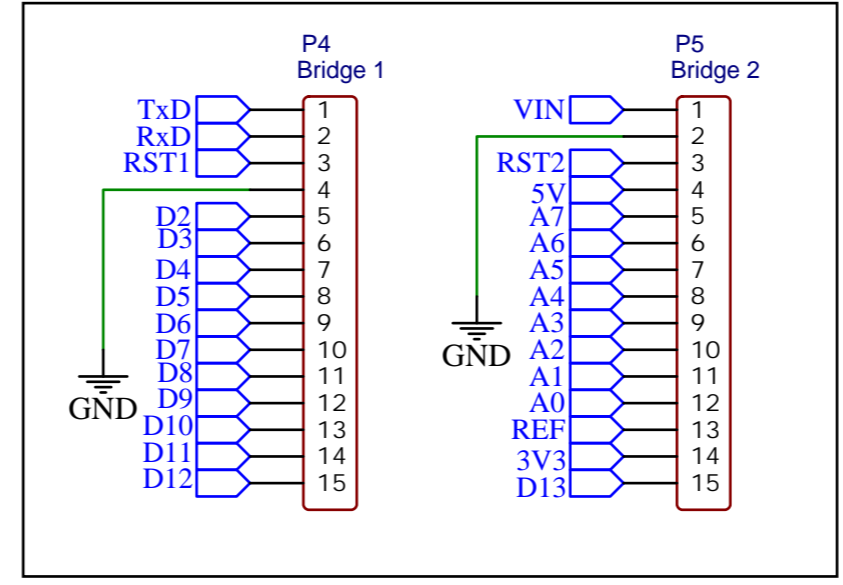

### CONNECTORS

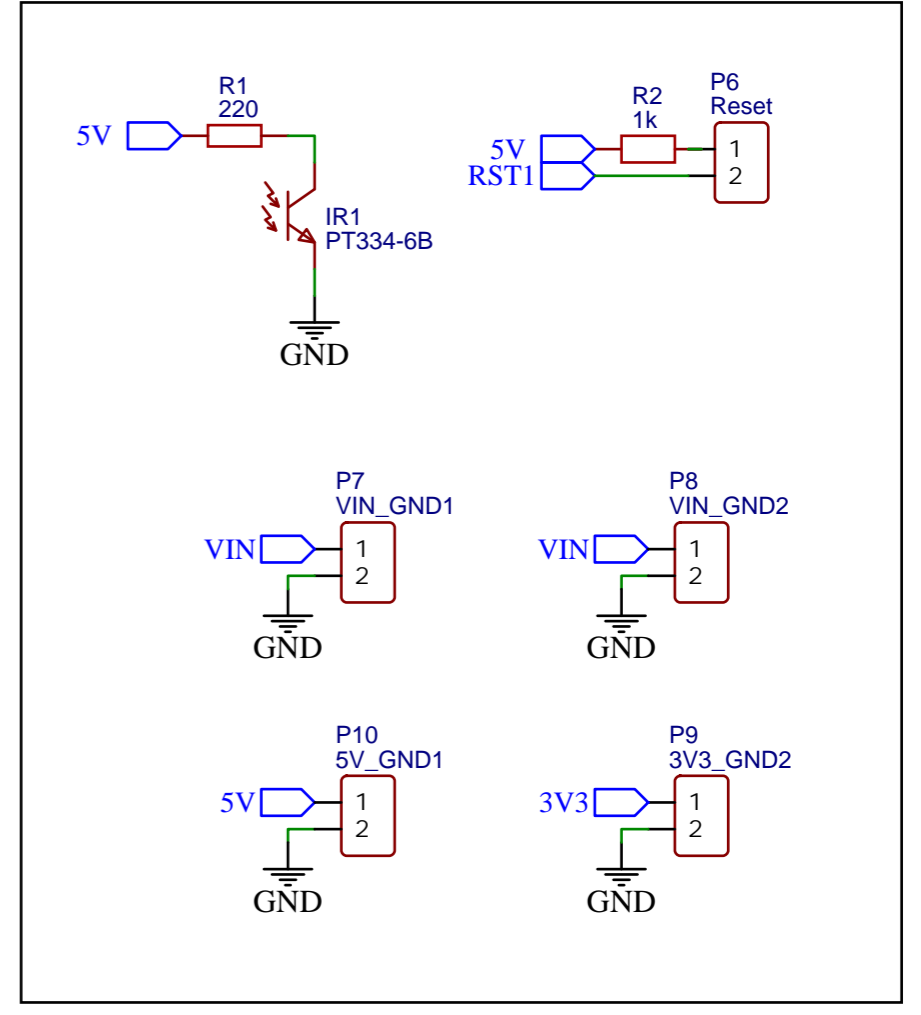

### SHIELD MEMORY CARD

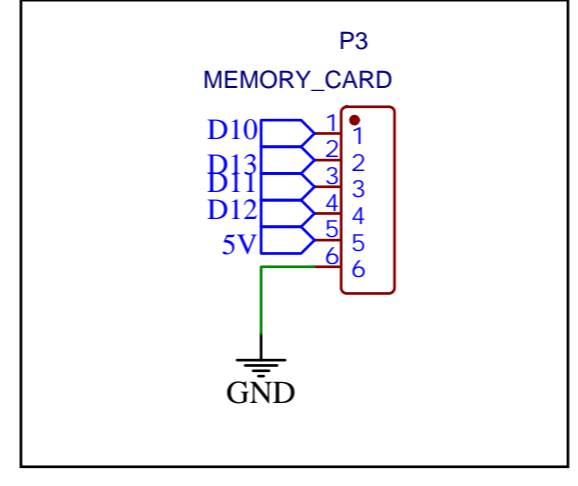

|                     |                                  |                             |
|---------------------|----------------------------------|-----------------------------|
| TITLE: Breakout PCB |                                  | REV: 6.0                    |
|                     | Company: maguimaraes@uesb.edu.br | Sheet: 1/2                  |
|                     | Date: 2022-11-06                 | Drawn By: Marcelo Guimarães |

## BRIDGES

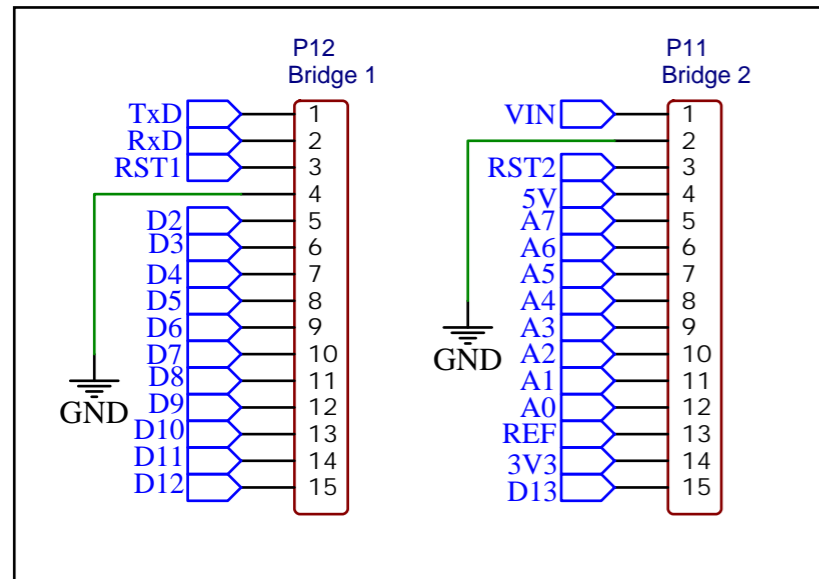

## SHIELDS AND CONNECTORS

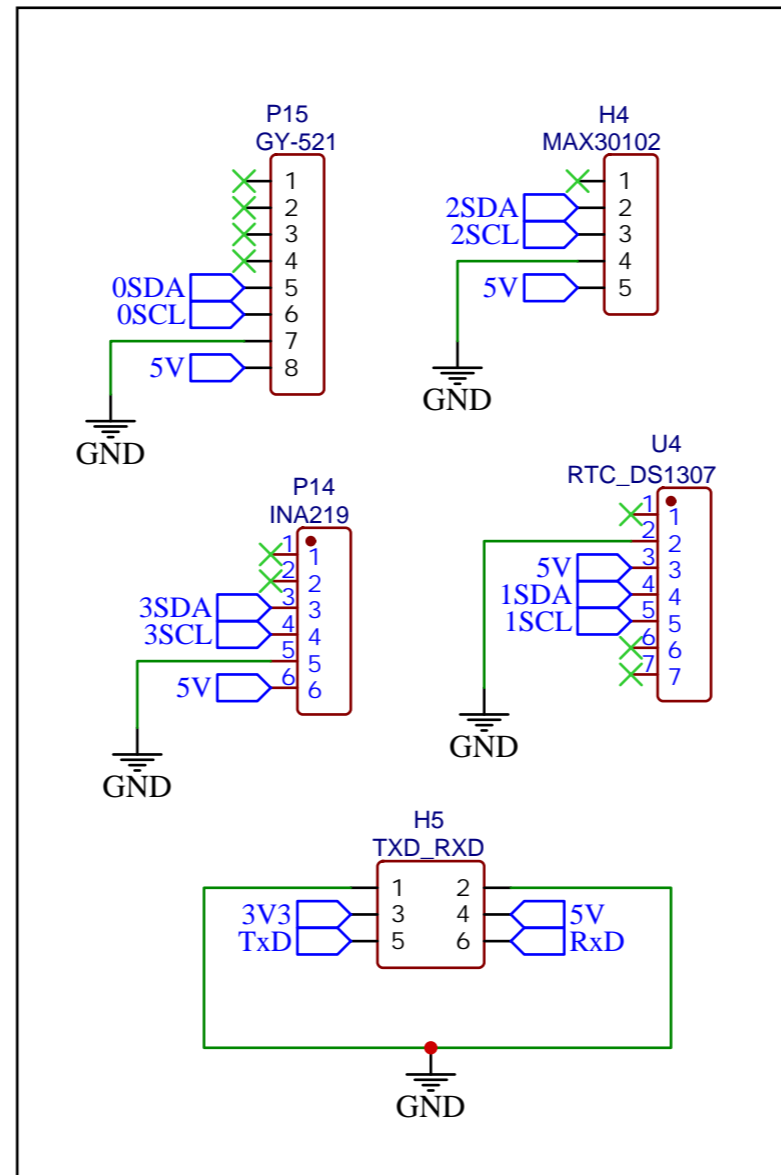

## TCA9548A I2C MULTIPLEXER

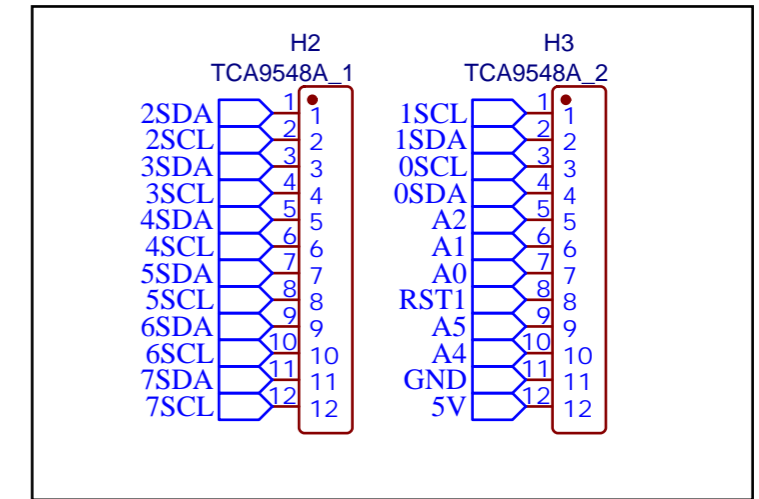

## SHIELD AD8232 ON/OFF

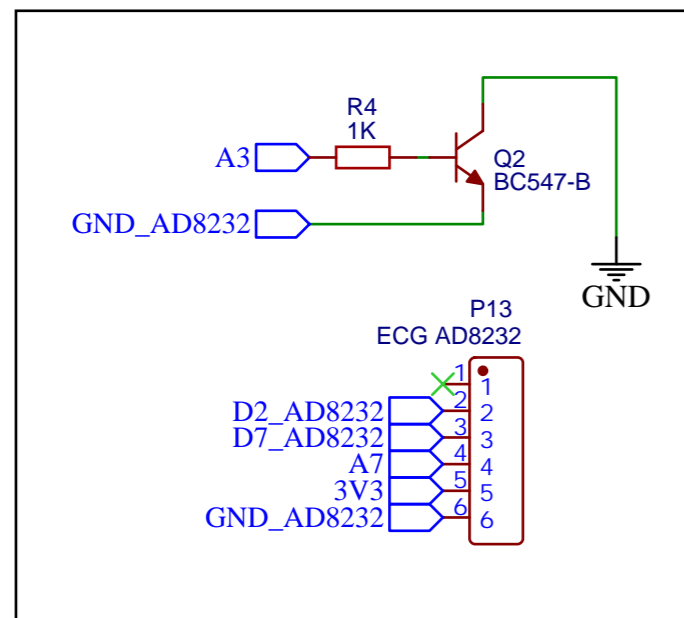

## POWERMETER AND AD8232

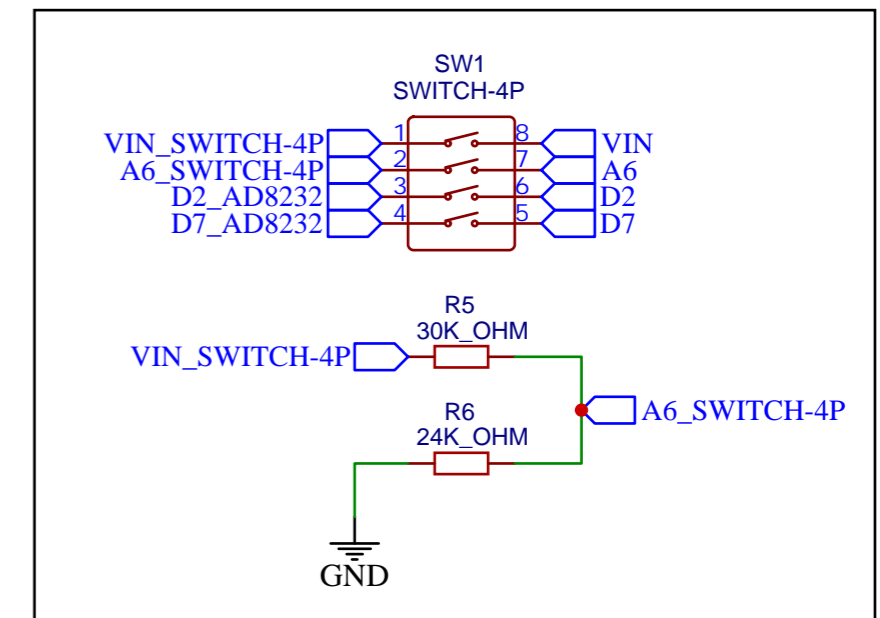

|                                |                      |                             |
|--------------------------------|----------------------|-----------------------------|
| TITLE: Connectivity Shield ADD |                      | REV: 6.0                    |
|                                | Company: maguimaraes | Sheet: 2/2                  |
|                                | Date: 2022-11-06     | Drawn By: Marcelo Guimarães |
